# Supplementary material for: Determination of Cd2+ and Pb2+ Based on Mesoporous Carbon Nitride/Self-Doped Polyaniline Nanofibers and Square Wave Anodic Stripping Voltammetry
Source: PubMed Central journal article supplement (PMC5302537; doi:10.3390/nano6010007), 2016-01-04
Supplement: nanomaterials-06-00007-s001.pdf [file nanomaterials-06-00007-s001.pdf]

## Supplementary Materials

### Preparation of SPAN Nanofibers

SPAN nanofibers were prepared according to the method provided by Zhang and co-workers [1]. Briefly, 0.11 g of cetyltrimethyl ammonium bromide (CTAB), 0.23 g of aniline (AN), 0.43 g of 2-aminobenzenesulfonic acid (ABS) were dissolved in 40 mL 0.15 M HCl solution. Then, 20 mL 0.06 M ammonium peroxydisulfate (APS) was added to the mixed solutions. The copolymerization reaction was performed under static conditions at 5 °C for 24 h. Finally, the resulting dark green precipitates were filtered, then, washed with ultrapure water and ethanol several times, and dried at room temperature.

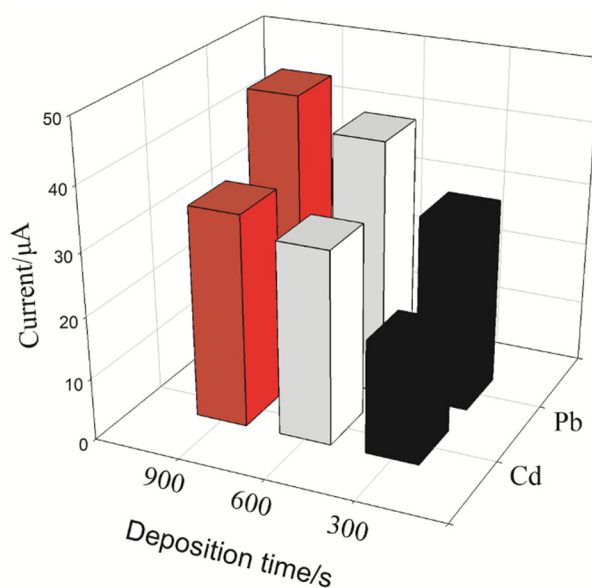

**Figure S1.** Deposition time effect on peak height in a solution containing  $300 \mu\text{g}\cdot\text{L}^{-1} \text{Bi}^{3+}$ ,  $10 \mu\text{g}\cdot\text{L}^{-1} \text{Pb}^{2+}$  and  $\text{Cd}^{2+}$ , and 300 mM NaCl. Square wave anodic stripping voltammetry (SWASV) parameters:  $E_{\text{begin}} = -1 \text{ V}$ ,  $E_{\text{end}} = -0.4 \text{ V}$ ,  $E_{\text{step}} = 0.010 \text{ V}$ ,  $E_{\text{pulse}} = 0.02 \text{ V}$ ,  $E_{\text{condition}} = -0.4 \text{ V}$ ,  $E_{\text{deposition}} = -1 \text{ V}$ , Frequency = 50 Hz, deposition time = 300–900 s, and equilibrium time = 20 s.

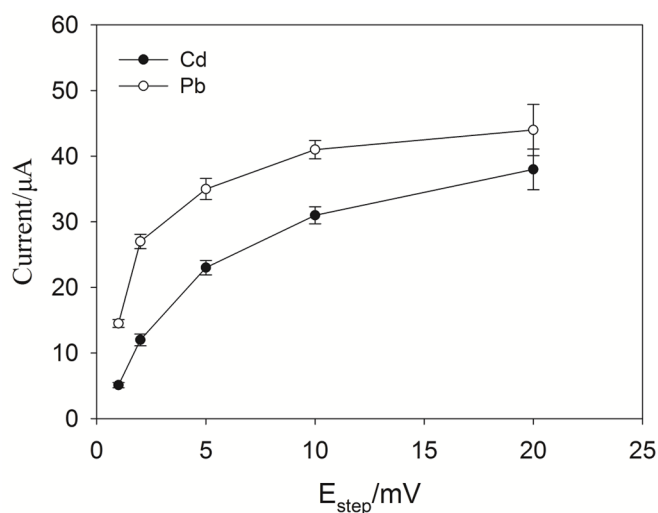

**Figure S2.** Optimization of step potential effect ( $E_{\text{step}}$ ) using a solution containing  $300 \mu\text{g}\cdot\text{L}^{-1} \text{Bi}^{3+}$ ,  $10 \mu\text{g}\cdot\text{L}^{-1} \text{Pb}^{2+}$  and  $\text{Cd}^{2+}$ , and 300 mM NaCl. SWASV parameters:  $E_{\text{begin}} = -1 \text{ V}$ ,  $E_{\text{end}} = -0.4 \text{ V}$ ,  $E_{\text{step}} = 0.001\text{--}0.02 \text{ V}$ ,  $E_{\text{pulse}} = 0.02 \text{ V}$ ,  $E_{\text{condition}} = -0.4 \text{ V}$ ,  $E_{\text{deposition}} = -1 \text{ V}$ , Frequency = 100 Hz, deposition time = 600 s, and equilibrium time = 20 s.

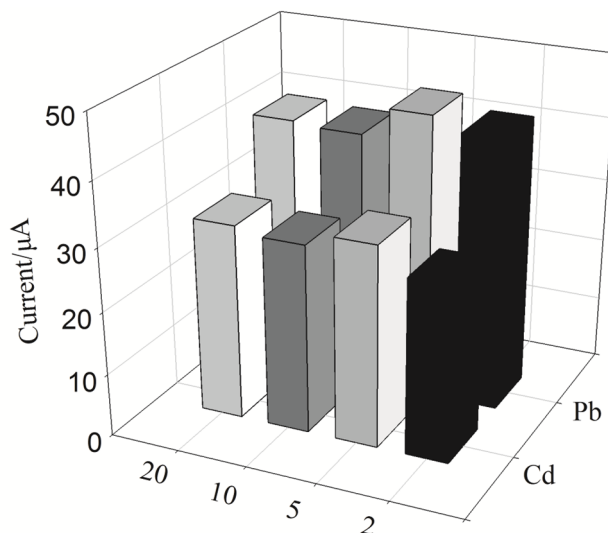

**Figure S3.** Equilibrium time effect on peak height in a solution containing  $300 \mu\text{g}\cdot\text{L}^{-1} \text{Bi}^{3+}$ ,  $10 \mu\text{g}\cdot\text{L}^{-1} \text{Pb}^{2+}$  and  $\text{Cd}^{2+}$ , and  $300 \text{ mM NaCl}$ . SWASV parameters:  $E_{\text{begin}} = -1 \text{ V}$ ,  $E_{\text{end}} = -0.4 \text{ V}$ ,  $E_{\text{step}} = 0.01 \text{ V}$ ,  $E_{\text{pulse}} = 0.02 \text{ V}$ ,  $E_{\text{condition}} = -0.4 \text{ V}$ ,  $E_{\text{deposition}} = -1 \text{ V}$ , Frequency =  $100 \text{ Hz}$ , deposition time =  $600 \text{ s}$ , and equilibrium time =  $2\text{--}20 \text{ s}$ .

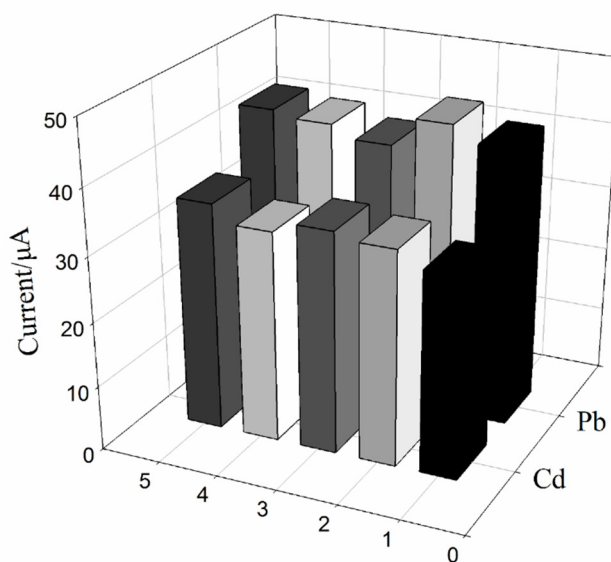

**Figure S4.** The reproducibility of proposed electrodes.

## Reference

1. Zhang, C.; Li, G.; Peng, H. Large-scale synthesis of self-doped polyaniline nanofibers. *Mater. Lett.* **2009**, *63*, 592–594.

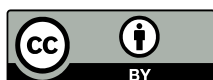

© 2016 by the authors; licensee MDPI, Basel, Switzerland. This article is an open access article distributed under the terms and conditions of the Creative Commons by Attribution (CC-BY) license (<http://creativecommons.org/licenses/by/4.0/>).
